# Supplementary material for: Antioxidant and Anti-Melanogenesis Effects of Teucrium chamaedrys L. Cell Suspension Extract and Its Main Phenylethanoid Glycoside in B16-F10 Cells
Source: MDPI journal article supplement (doi:10.3390/plants13060808), 2024-03-12
Supplement: s1 [file s1]

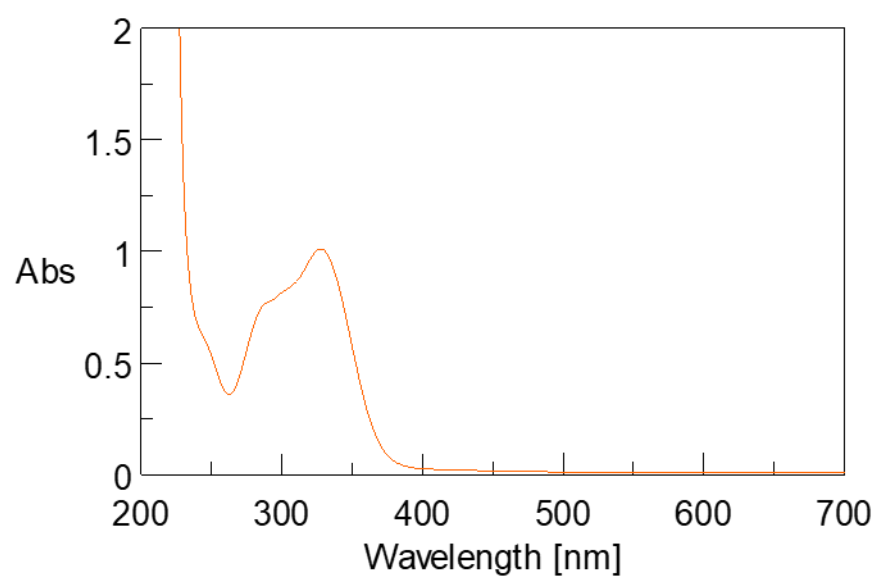

**Figure S1.** Absorption spectrum of Cell-Ex.

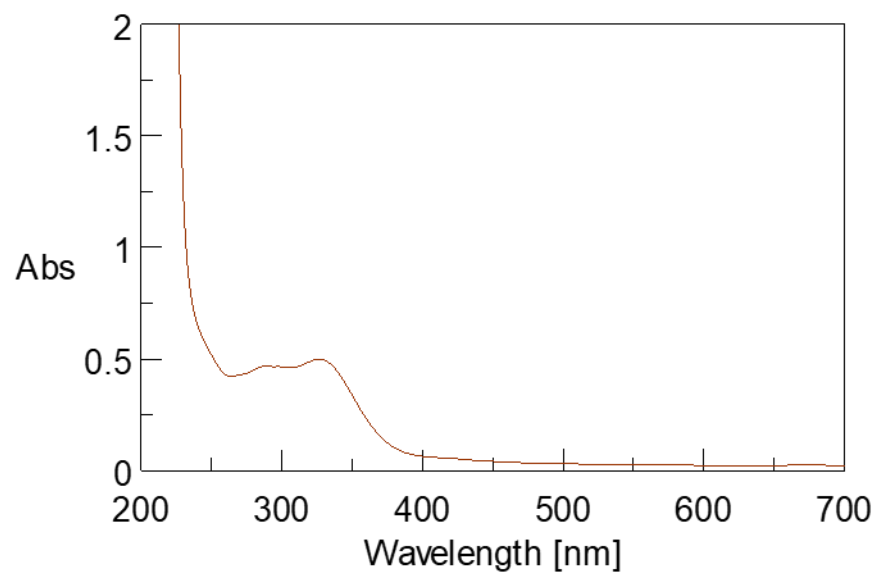

**Figure S2.** Absorption spectrum of Leaf-Ex.

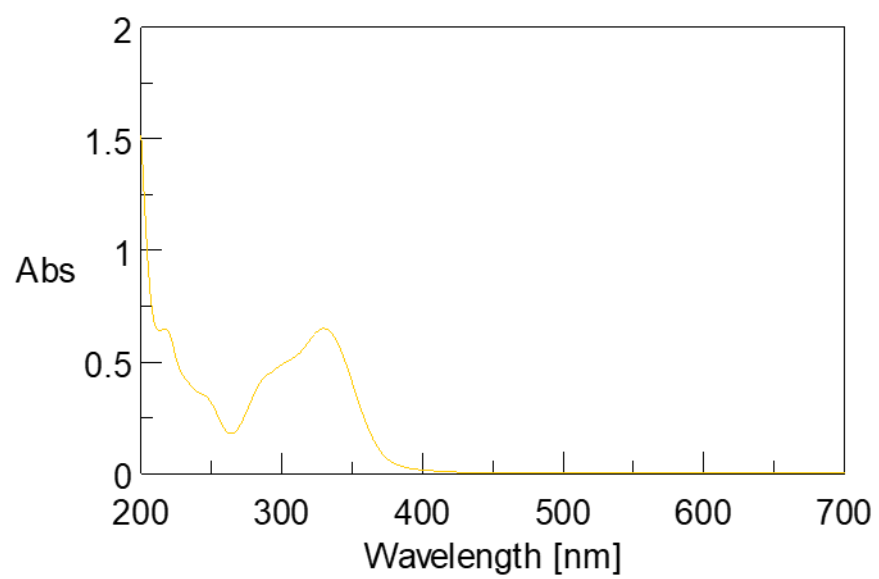

**Figure S3.** Absorption spectrum of TS.

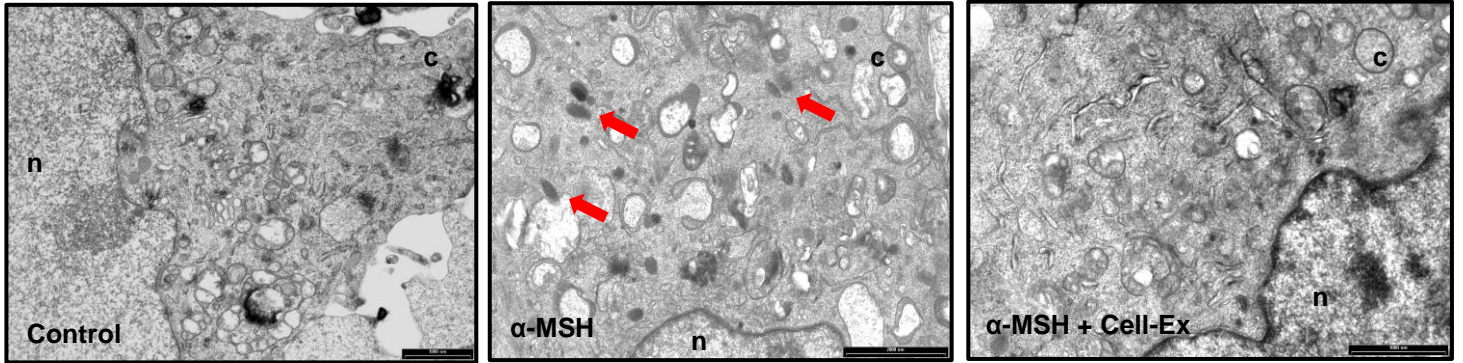

**Figure S4.** Ultrastructural analysis of B16-F10 cells by TEM (nucleus, n; cytoplasm, c). The red arrows show an example of mature melanosomes (stage IV) (bar: 2000 nm).

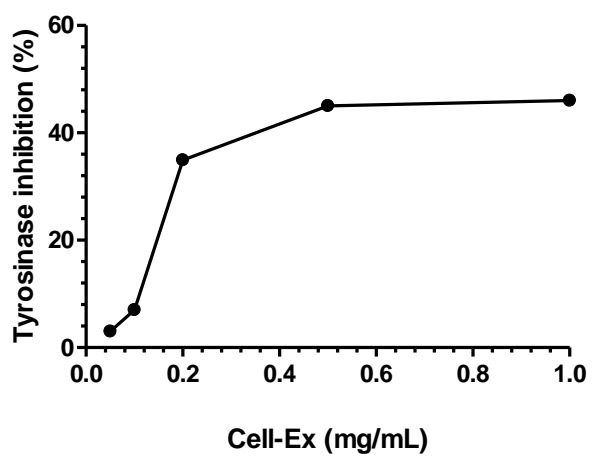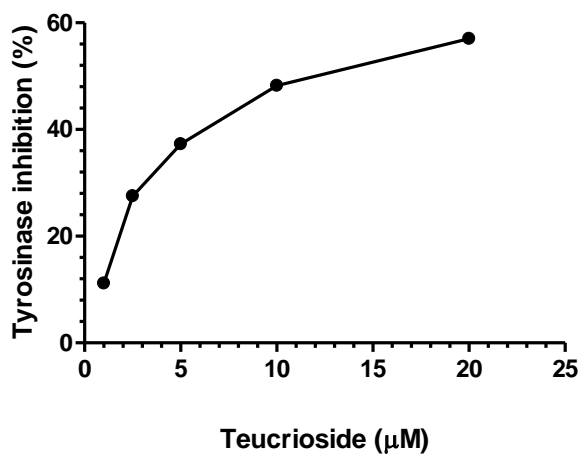

**Figure S5.** The effects of Cell-Ex and pure TS on mushroom tyrosinase activity.
